# Supplementary material for: Analysis of adverse drug events in pulmonary Mycobacterium avium complex disease using spontaneous reporting system
Source: Springer Nature journal article supplement (doi:10.1186/s12879-022-07568-z), 2022-06-29
Supplement: MOESM2 [file 23219870]

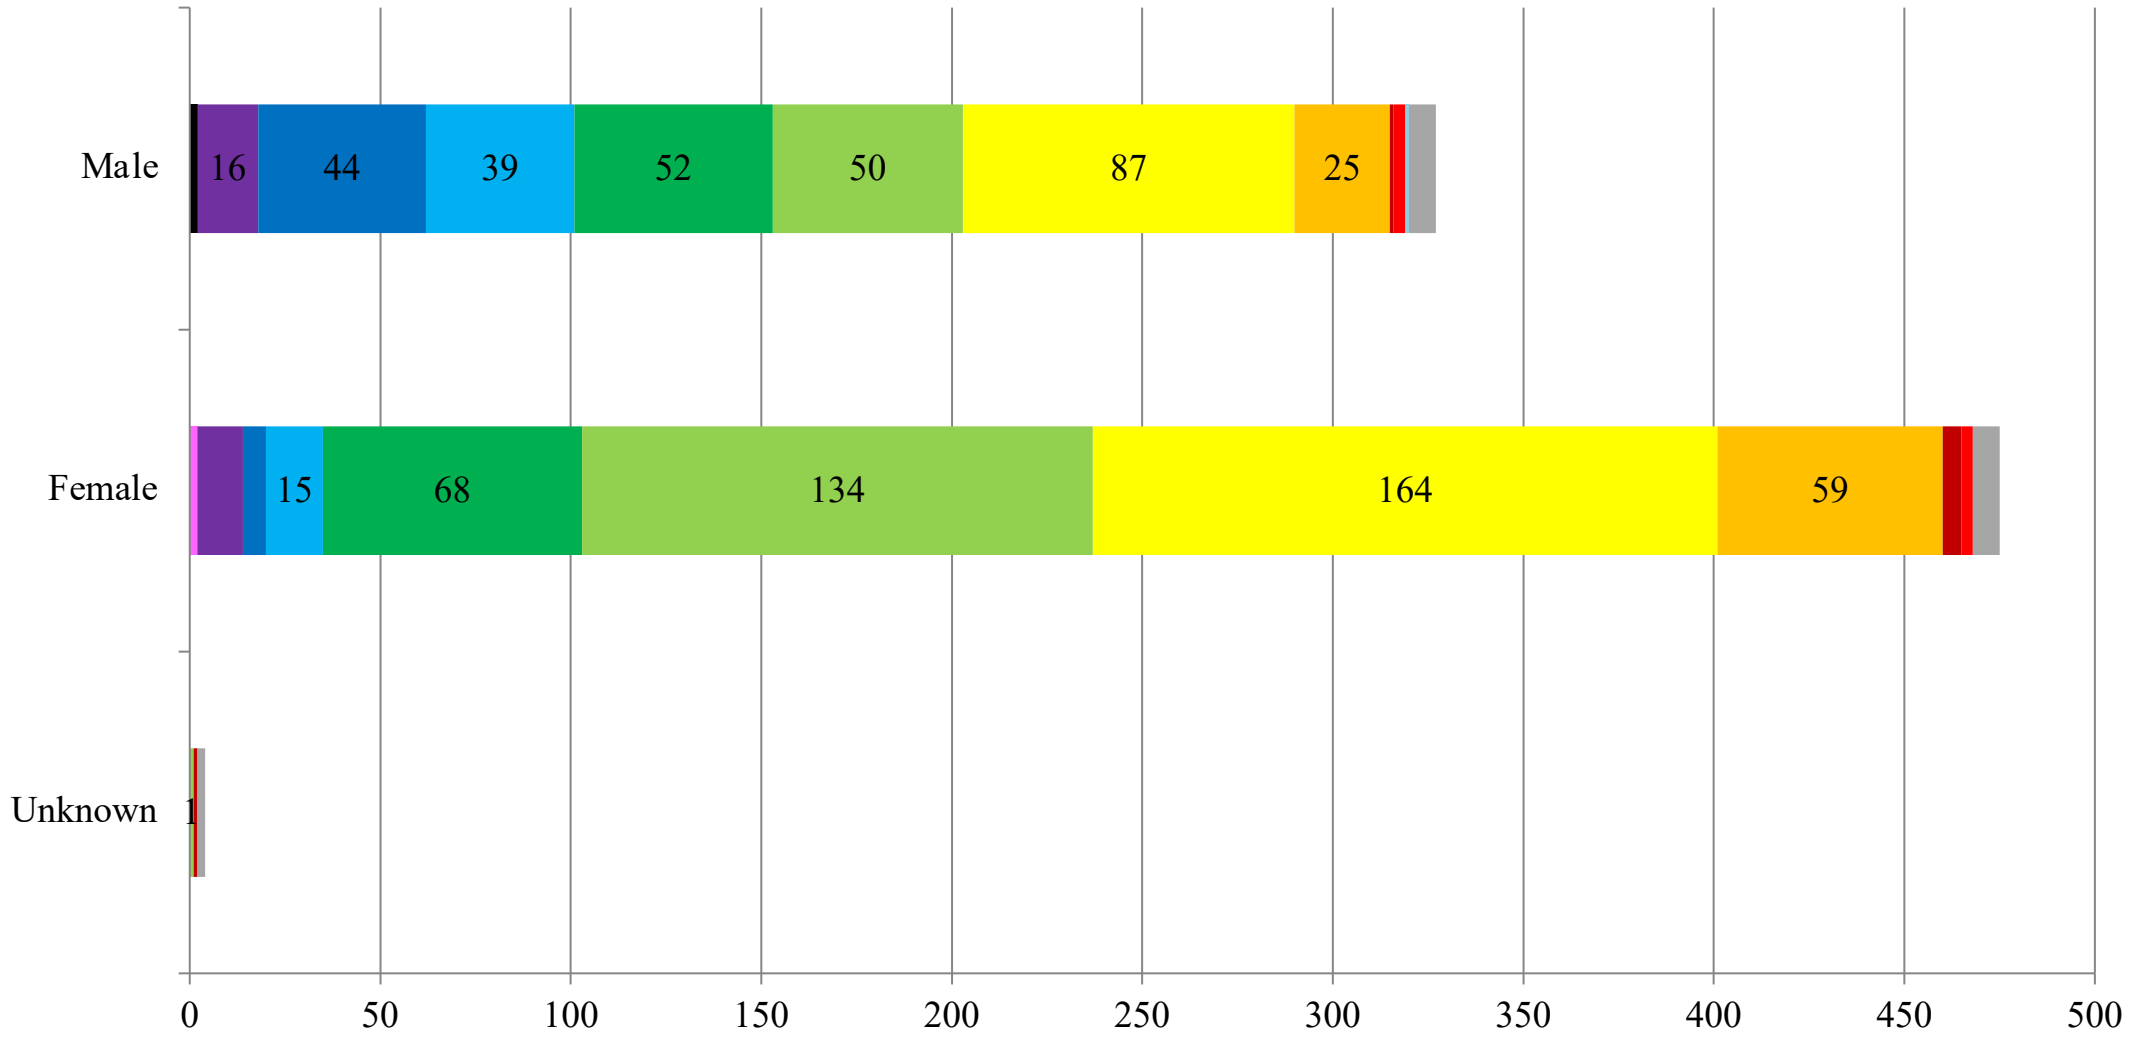

<10s
  10s
  20s
  30s
  40s
  50s
  60s
  70s
  80s
  90s
  Elderly
  Adult
  Unknown
