# Supplementary material for: Analysis of adverse drug events in pulmonary Mycobacterium avium complex disease using spontaneous reporting system
Source: Springer Nature journal article supplement (doi:10.1186/s12879-022-07568-z), 2022-06-29

a

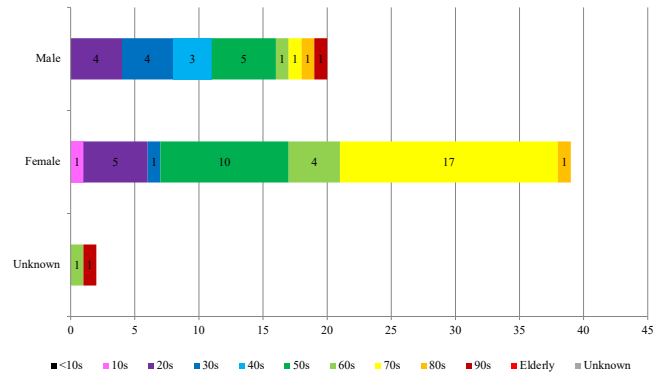

b

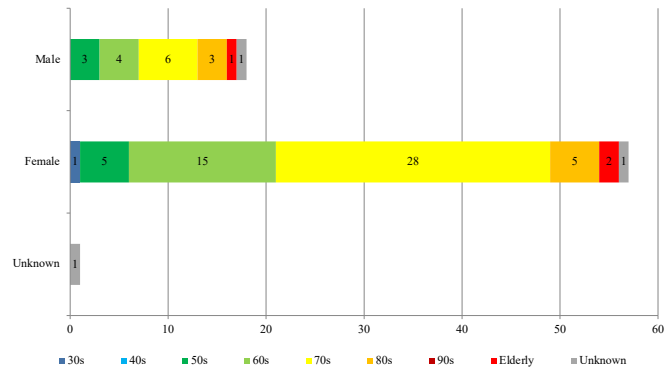

c

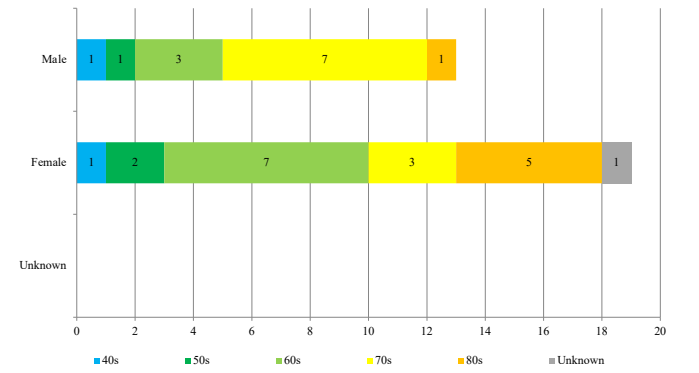

Supplement: MOESM4 [file 23219870]
